# Supplementary material for: Performance characteristics of prostate-specific antigen density and biopsy core details to predict oncological outcome in patients with intermediate to high-risk prostate cancer underwent robot-assisted radical prostatectomy
Source: Springer Nature journal article supplement (doi:10.1186/s12894-017-0238-y), 2017-06-23
Supplement: MOESM1 [file 12467604]

**Table S1 Unfavorable pathological factors associated with biochemical recurrence in entire cohort**

|                                                | Univariate analyses |              |                       | Multivariate analyses |              |                       |
|------------------------------------------------|---------------------|--------------|-----------------------|-----------------------|--------------|-----------------------|
|                                                | <b>HR</b>           | <b>95%CI</b> | <b><i>p</i>-value</b> | <b>HR</b>             | <b>95%CI</b> | <b><i>p</i>-value</b> |
| Tumor stage $\geq$ pT3 vs $\leq$ pT2           | 5.098               | 2.787-9.324  | <b>&lt;0.001</b>      | 3.501                 | 1.876-6.535  | <b>&lt;0.001</b>      |
| Index tumor volume $>0.718$ vs $\leq 0.718$ cc | 4.984               | 1.966-12.63  | <b>&lt;0.001</b>      | 3.411                 | 1.317-8.833  | <b>0.012</b>          |
| Gleason score $\geq 8$ vs $\leq 7$             | 3.071               | 1.692-5.574  | <b>&lt;0.001</b>      | 2.494                 | 1.358-4.583  | <b>0.003</b>          |
| Surgical margin status positive vs negative    | 3.815               | 2.099-6.936  | <b>&lt;0.001</b>      |                       |              |                       |

*HR* Hazard ratio, *95%CI* 95% confidence interval, Bold indicates statistically significant.
